# Supplementary material
Source: HighWire-hosted journal article supplement (https://jitc.bmj.com/content/9/7/e002646)

**SUPPLEMENTARY MATERIAL**

**Supplementary table 1.** Number of genes differentially expressed between subgroups based on objective response (n=46), MCPyV status (assessed by IHC [n=48] or PCR [n=36]), PD-L1 status (n=48), and CD8<sup>+</sup> T-cell density at the IM (n=45) and TC (n=47)

| Comparison                            | p≤.001 | p≤.001 up | p≤.001 down | p≤.001 up/ FC | p≤.001 down/ FC | Adjusted p, 1% FDR | Adjusted p, 1% FDR |      |       |         | Adjusted p, 10% FDR | Adjusted p, 10% FDR |      |       |         |
|---------------------------------------|--------|-----------|-------------|---------------|-----------------|--------------------|--------------------|------|-------|---------|---------------------|---------------------|------|-------|---------|
|                                       |        |           |             |               |                 |                    | Up                 | Down | Up/FC | Down/FC |                     | Up                  | Down | Up/FC | Down/FC |
| Response                              | 1      | 1         | 0           | 0             | 0               | 0                  | 0                  | 0    | 0     | 0       | 0                   | 0                   | 0    | 0     | 0       |
| MCPyV status by IHC                   | 1470   | 741       | 729         | 578           | 641             | 1316               | 657                | 659  | 527   | 587     | 4179                | 2119                | 2060 | 1183  | 1510    |
| MCPyV status by PCR                   | 974    | 490       | 484         | 452           | 473             | 643                | 323                | 320  | 310   | 318     | 2847                | 1435                | 1412 | 1041  | 1226    |
| PD-L1 status                          | 5      | 4         | 1           | 3             | 1               | 0                  | 0                  | 0    | 0     | 0       | 0                   | 0                   | 0    | 0     | 0       |
| CD8 <sup>+</sup> T-cell density at IM | 25     | 19        | 6           | 19            | 4               | 0                  | 0                  | 0    | 0     | 0       | 0                   | 0                   | 0    | 0     | 0       |
| CD8 <sup>+</sup> T-cell density at TC | 517    | 483       | 34          | 476           | 10              | 250                | 247                | 3    | 247   | 1       | 995                 | 797                 | 198  | 745   | 47      |

Values given are the number of genes with a p value ≤.001 for each criterion.

Abbreviations: FC, ±1.5-fold change; FDR, false discovery rate; IHC, immunohistochemistry; IM, invasive margin; MCPyV, Merkel cell polyomavirus; PCR, polymerase chain reaction; PD-L1, programmed death ligand 1; TC, tumor center.

**Supplementary table 2.** Differentially expressed gene sets between responders and nonresponders

| Pathway                                                                                                        | p value | Adjusted p value | Enrichment score | Normalized enrichment score |
|----------------------------------------------------------------------------------------------------------------|---------|------------------|------------------|-----------------------------|
| REACTOME_INTERFERON_ALPHA_BETA_SIGNALING                                                                       | .000202 | .012231          | 0.612175         | 2.382347                    |
| REACTOME_INTERFERON_SIGNALING                                                                                  | .000202 | .012231          | 0.491436         | 2.30819                     |
| REACTOME_INTERFERON_GAMMA_SIGNALING                                                                            | .000405 | .021896          | 0.514191         | 2.057354                    |
| KEGG_ANTIGEN_PROCESSING_AND_PRESENTATION                                                                       | .000611 | .029934          | 0.484083         | 1.97057                     |
| REACTOME_ANTIVIRAL_MECHANISM_BY_IFN_STIMULATE D_GENES                                                          | .000809 | .036154          | 0.465642         | 1.910754                    |
| NABA_ECM_GLYCOPROTEINS                                                                                         | .000199 | .012231          | -0.39276         | -1.91453                    |
| NABA_COLLAGENS                                                                                                 | .000397 | .021896          | -0.52791         | -2.00587                    |
| REACTOME_INFLUENZA_LIFE_CYCLE                                                                                  | .000198 | .012231          | -0.43146         | -2.01752                    |
| REACTOME_CHOLESTEROL_BIOSYNTHESIS                                                                              | .000202 | .012231          | -0.65408         | -2.03496                    |
| NABA_CORE_MATRISOME                                                                                            | .000199 | .012231          | -0.41566         | -2.11868                    |
| REACTOME_FORMATION_OF_THE_TERNARY_COMPLEX_AND SUBSEQUENTLY THE 43S COMPLEX                                     | .000198 | .012231          | -0.5622          | -2.1641                     |
| REACTOME_ACTIVATION_OF_THE_MRNA_UPON_BINDING_OF_THE_CAP_BINDING_COMPLEX_AND_EIFS_AND_SUBSEQUENT BINDING TO 43S | .000198 | .012231          | -0.55359         | -2.19292                    |
| REACTOME_TRANSLATION                                                                                           | .000198 | .012231          | -0.46702         | -2.20515                    |
| REACTOME_SRP_DEPENDENT_COTRANSLATIONAL_PROTEIN TARGETING TO MEMBRANE                                           | .0002   | .012231          | -0.51419         | -2.31943                    |
| REACTOME_NONSENSE_MEDIATED_DECAY_ENHANCED_BY_THE_EXON_JUNCTION_COMPLEX                                         | .000199 | .012231          | -0.54923         | -2.46874                    |
| REACTOME_INFLUENZA_VIRAL_RNA_TRANSCRIPTION_AND REPLICATION                                                     | .0002   | .012231          | -0.56359         | -2.50749                    |
| KEGG_RIBOSOME                                                                                                  | .000199 | .012231          | -0.61976         | -2.68182                    |
| REACTOME_3_UTR_MEDIATED_TRANSLATIONAL_REGULATION                                                               | .000199 | .012231          | -0.59995         | -2.6849                     |
| REACTOME_PEPTIDE_CHAIN_ELONGATION                                                                              | .000199 | .012231          | -0.63264         | -2.7338                     |

Adjusted p values were calculated using the Benjamin-Hochberg method. A positive enrichment score identifies gene sets enriched in responders (PR/CR), a negative enrichment score identifies gene sets enriched in nonresponders (SD/PD).

Abbreviations: CR, complete response; PD, progressive disease; PR, partial response; SD, stable disease.

**Supplementary table 3.** Correlation between MHC class I gene expression and immune gene signatures

| <b>Signature</b>                    | <b>Spearman's <math>\rho</math></b> |
|-------------------------------------|-------------------------------------|
| HLA-C                               | 0.892                               |
| HLA-F                               | 0.861                               |
| HLA-B                               | 0.847                               |
| MHCI                                | 0.804                               |
| HLA-A                               | 0.799                               |
| MHC                                 | 0.784                               |
| HLA-H                               | 0.772                               |
| human_immune_stimulatory_checkpoint | 0.766                               |
| Guinney2015.crc.TGFB2               | 0.765                               |
| msd.asco.2016.TcellExhaustion       | 0.761                               |
| msd.asco.2016.TcellAndNK            | 0.755                               |
| human_immune_inhibitory_checkpoint  | 0.731                               |
| HLA-DPB1                            | 0.724                               |
| angelova2015.Th1                    | 0.724                               |
| IMvigor210.APM                      | 0.724                               |
| HLA-DRA                             | 0.722                               |
| MHCII                               | 0.720                               |
| Lehmann.2011.IM.up.refined          | 0.718                               |
| CongGroup3_IFN                      | 0.717                               |
| MSD_Cristescu_2018_tcell_inflamed   | 0.714                               |
| HLA-DMA                             | 0.711                               |
| Chaussabel2008_M3.4_ifn.sig         | 0.709                               |
| HLA-DMB                             | 0.705                               |
| IMvigor210.Immune_Checkpoint        | 0.705                               |
| Hu2018Glucocorticoid.down           | 0.705                               |
| Chaussabel2008_M5.12_ifn.sig        | 0.704                               |
| HLA-DPA1                            | 0.704                               |
| CongGroup1_IFN                      | 0.701                               |
| kardos_2016_immune_supression       | 0.699                               |
| angelova2015.T.cells                | 0.696                               |
| angelova2015.Cytotoxic.cells        | 0.695                               |
| angelova2015.DC                     | 0.694                               |
| bindea2013.pDC                      | 0.694                               |
| bindea2013.BloodVessel              | 0.692                               |
| IFN_signature                       | 0.684                               |
| msd.asco.2015.TCR                   | 0.680                               |
| msd.asco.2015.Immune                | 0.674                               |
| HLA-L                               | 0.669                               |

|                                       |        |
|---------------------------------------|--------|
| angelova2015.Treg                     | 0.668  |
| S5_NK_cells_plus_Monocytes            | 0.667  |
| HLA-DQB2                              | 0.667  |
| xcell.Macrophages M1                  | 0.658  |
| xcell.Macrophages                     | 0.657  |
| CD141.Geok.8genes                     | 0.657  |
| HLA-DOA                               | 0.656  |
| Sharma2017.Ifng.Urothelial            | 0.651  |
| S1_NK_cells                           | 0.650  |
| DDR_NER                               | -0.653 |
| IMvigor210.Nucleotide_excision_repair | -0.686 |
| IMvigor210.Fanconi                    | -0.700 |
| EC                                    | -0.712 |
| IMvigor210.DDR                        | -0.723 |

Abbreviations: MHC, major histocompatibility complex.

**Supplementary table 4.** Differentially expressed gene sets between patients with PD-L1+ and PD-L1- tumors

| Pathway                                                                    | p value    | Adjusted p value | Enrichment score | Normalized enrichment score |
|----------------------------------------------------------------------------|------------|------------------|------------------|-----------------------------|
| KEGG_ANTIGEN_PROCESSING_AND_PRESENTATION                                   | .000168492 | .009508658       | 0.57857323       | 2.293500381                 |
| REACTOME_LIGAND_GATED_ION_CHANNEL_TRANSPORT                                | .000541028 | .012434531       | 0.681315369      | 2.018538526                 |
| REACTOME_INTERFERON_ALPHA_BETA_SIGNALING                                   | .000683878 | .014065429       | 0.506477849      | 1.912381697                 |
| BIOCARTA_NO2IL12_PATHWAY                                                   | .001268346 | .01962806        | 0.653175528      | 1.903797359                 |
| KEGG_AUTOIMMUNE_THYROID_DISEASE                                            | .00123348  | .019507963       | 0.558789179      | 1.901785443                 |
| BIOCARTA_RHO_PATHWAY                                                       | .001163332 | .018686017       | -0.527669616     | -1.902799265                |
| REACTOME_ACTIVATION_OF_NF_KAPPAB_IN_B_CELLS                                | .000245881 | .009508658       | -0.457092608     | -1.908408539                |
| REACTOME_LAGGING_STRAND_SYNTHESIS                                          | .001570563 | .02172596        | -0.623544051     | -1.934655425                |
| KEGG_RIBOSOME                                                              | .000249439 | .009508658       | -0.435802259     | -1.935386139                |
| REACTOME_FORMATION_OF_THE_TERNARY_COMPLEX_AND_SUBSEQUENTLY_THE_43S_COMPLEX | .000237982 | .009508658       | -0.493783597     | -1.937914031                |
| REACTOME_MUSCLE_CONTRACTION                                                | .000238209 | .009508658       | -0.497393127     | -1.940678339                |
| BIOCARTA_CDMAC_PATHWAY                                                     | .00132626  | .01962806        | -0.661435744     | -1.942488533                |
| BIOCARTA_IL1R_PATHWAY                                                      | .000924428 | .016239421       | -0.545258323     | -1.951131695                |
| REACTOME_CDT1_ASSOCIATION_WITH_THE_CDC6_ORC_ORIGIN_COMPLEX                 | .000240906 | .009508658       | -0.483376853     | -1.955281434                |
| REACTOME_SYNTHESIS_OF_DNA                                                  | .000253807 | .009508658       | -0.441423123     | -1.970524787                |
| REACTOME_RESPONSE_TO_ELEVATED_PLATELET_CYTOSOLIC_CA2                       | .000247586 | .009508658       | -0.456329169     | -1.985005887                |
| BIOCARTA_CD40_PATHWAY                                                      | .000884173 | .016230896       | -0.676046897     | -1.985398215                |
| KEGG_SPLICEOSOME                                                           | .000265745 | .009508658       | -0.421301449     | -1.993398366                |
| REACTOME_TRANSLATION                                                       | .00026824  | .009508658       | -0.418046104     | -2.028284805                |
| PID_INTEGRIN2_PATHWAY                                                      | .000460511 | .012427842       | -0.602029417     | -2.038942389                |
| PID_UPA_UPAR_PATHWAY                                                       | .000709555 | .014065429       | -0.545811742     | -2.042871423                |
| REACTOME_3_UTR_MEDIATED_TRANSLATIONAL_REGULATION                           | .000258198 | .009508658       | -0.448856599     | -2.066056493                |
| KEGG_DRUG_METABOLISM_OTHER_ENZYMES                                         | .000460511 | .012427842       | -0.594416509     | -2.094096712                |
| REACTOME_METABOLISM_OF_NUCLEOTIDES                                         | .000246792 | .009508658       | -0.497317747     | -2.09866367                 |
| PID_INTEGRIN3_PATHWAY                                                      | .000236407 | .009508658       | -0.555802022     | -2.10013685                 |
| REACTOME_SMOOTH_MUSCLE_CONTRACTION                                         | .000227324 | .009508658       | -0.641231315     | -2.130502372                |

|                                           |            |            |              |              |
|-------------------------------------------|------------|------------|--------------|--------------|
| REACTOME_METABOLISM_OF_NON_CODING_RNA     | .000239234 | .009508658 | -0.540872064 | -2.133036624 |
| PID_INTEGRIN_A9B1_PATHWAY                 | .000227324 | .009508658 | -0.647054336 | -2.14984946  |
| PID_FRA_PATHWAY                           | .000232288 | .009508658 | -0.58518954  | -2.167712328 |
| PID_INTEGRIN1_PATHWAY                     | .000246245 | .009508658 | -0.518915041 | -2.175362112 |
| BIOCARTA_PROTEASOME_PATHWAY               | .000230894 | .009508658 | -0.629372138 | -2.195175656 |
| REACTOME_CHONDROITIN_SULFATE_BIOSYNTHESIS | .000224165 | .009508658 | -0.710721201 | -2.241121085 |
| PID_AVB3_OPN_PATHWAY                      | .000231107 | .009508658 | -0.651099487 | -2.329869703 |

Adjusted p values were calculated using the Benjamin-Hochberg method. A positive enrichment score identifies gene sets enriched in patients with PD-L1+ tumors, a negative enrichment score identifies gene sets enriched in patients with PD-L1- tumors.

Abbreviations: PD-L1, programmed death ligand 1.

**Supplementary table 5.** Differentially expressed gene sets between patients with median or higher CD8<sup>+</sup> T-cell density and less than median CD8<sup>+</sup> T-cell density at the invasive margin

| Pathway                                                                           | p value | Adjusted p value | Enrichment score | Normalized enrichment score |
|-----------------------------------------------------------------------------------|---------|------------------|------------------|-----------------------------|
| KEGG_ANTIGEN_PROCESSING_AND_PRESENTATION                                          | .000161 | .007722          | 0.655323         | 2.613255                    |
| REACTOME_IMMUNOREGULATORY_INTERACTIONS_BETWEEN_A_LYMPHOID_AND_A_NON_LYMPHOID_CELL | .000161 | .007722          | 0.652793         | 2.576579                    |
| REACTOME_INTERFERON_ALPHA_BETA_SIGNALING                                          | .000164 | .007722          | 0.671745         | 2.55499                     |
| KEGG_GRAFT_VERSUS_HOST_DISEASE                                                    | .000169 | .007722          | 0.716776         | 2.492694                    |
| REACTOME_INTERFERON_GAMMA_SIGNALING                                               | .000163 | .007722          | 0.622885         | 2.430537                    |
| PID_IL12_2PATHWAY                                                                 | .000161 | .007722          | 0.596681         | 2.360936                    |
| REACTOME_INTERFERON_SIGNALING                                                     | .000151 | .007722          | 0.512755         | 2.343                       |
| REACTOME_ACTIVATION_OF_THE_PRE_REPLICATIVE_COMPLEX                                | .00017  | .007722          | 0.618365         | 2.08321                     |
| BIOCARTA_NO2IL12_PATHWAY                                                          | .000522 | .008795          | 0.700537         | 2.065272                    |
| REACTOME_TRNA_AMINOACYLATION                                                      | .000167 | .007722          | 0.548292         | 2.012495                    |
| KEGG_AUTOIMMUNE_THYROID_DISEASE                                                   | .000508 | .008787          | 0.586966         | 2.010615                    |
| KEGG_SYSTEMIC_LUPUS_ERYTHEMATOSUS                                                 | .000152 | .007722          | 0.442031         | 1.985548                    |
| KEGG_ALLOGRAFT_REJECTION                                                          | .00051  | .008787          | 0.582329         | 1.97917                     |
| REACTOME_STRIATED_MUSCLE_CONTRACTION                                              | .001028 | .011998          | 0.589409         | 1.952887                    |
| KEGG_AMINOACYL_TRNA_BIOSYNTHESIS                                                  | .000166 | .007722          | 0.522264         | 1.910956                    |
| BIOCARTA_HDAC_PATHWAY                                                             | .0012   | .013398          | -0.53716         | -1.90303                    |
| PID_AR_NONGENOMIC_PATHWAY                                                         | .001464 | .014804          | -0.51843         | -1.90361                    |
| PID_ERBB1_DOWNSTREAM_PATHWAY                                                      | .000568 | .009157          | -0.40359         | -1.90997                    |
| BIOCARTA_MTOR_PATHWAY                                                             | .002385 | .018975          | -0.57036         | -1.9115                     |
| BIOCARTA_FMLP_PATHWAY                                                             | .000994 | .011849          | -0.50355         | -1.9146                     |
| PID_TGFBR_PATHWAY                                                                 | .001553 | .014804          | -0.45742         | -1.9149                     |
| KEGG_NEUROTROPHIN_SIGNALING_PATHWAY                                               | .000296 | .007722          | -0.39211         | -1.9158                     |
| SIG_IL4RECEPTOR_IN_B_LYPHOCYTES                                                   | .0012   | .013398          | -0.54185         | -1.91964                    |
| REACTOME_THROMBOXANE_SIGNALLING_THROUGH_TP_RECEPTOR                               | .002378 | .018975          | -0.5666          | -1.9236                     |

|                                                                                                                           |         |         |          |          |
|---------------------------------------------------------------------------------------------------------------------------|---------|---------|----------|----------|
| REACTOME_ACTIVATED_NOTCH1_TRANSMITS_SIGNAL_TO_THE_NUCLEUS                                                                 | .002639 | .019636 | -0.5548  | -1.92387 |
| SIG_CHEMOTAXIS                                                                                                            | .001004 | .011849 | -0.47987 | -1.92422 |
| PID_NOTCH_PATHWAY                                                                                                         | .001553 | .014804 | -0.46106 | -1.93014 |
| REACTOME_MAP_KINASE_ACTIVATION_IN_TLR_CASCADE                                                                             | .000513 | .008787 | -0.47323 | -1.9312  |
| REACTOME_MAPK_TARGETS_NUCLEAR_EVENTS_MEDIATED_BY_MAP_KINASES                                                              | .000971 | .011811 | -0.53079 | -1.93286 |
| REACTOME_SIGNALING_BY_EGFR_IN_CANCER                                                                                      | .000571 | .009157 | -0.41261 | -1.94727 |
| REACTOME_RESPIRATORY_ELECTRON_TRANSPORT_ATP_SYNTHESIS_BY_CHEMIOSMOTIC_COUPLING_AND_HEAT_PRODUCTION_BY_UNCOUPLING_PROTEINS | .000273 | .007722 | -0.43357 | -1.95503 |
| KEGG_ERBB_SIGNALING_PATHWAY                                                                                               | .000277 | .007722 | -0.427   | -1.95515 |
| BIOCARTA_ERK_PATHWAY                                                                                                      | .000727 | .01092  | -0.54892 | -1.95798 |
| PID_AVB3_OPN_PATHWAY                                                                                                      | .000488 | .008787 | -0.53457 | -1.96284 |
| PID_TRKR_PATHWAY                                                                                                          | .000263 | .007722 | -0.4603  | -1.9716  |
| SA_TRKA_RECEPTOR                                                                                                          | .001644 | .015226 | -0.63455 | -1.97434 |
| REACTOME_SIGNALLING_BY_NGF                                                                                                | .000338 | .008063 | -0.37621 | -1.98322 |
| PID_MAPK_TRK_PATHWAY                                                                                                      | .000734 | .01092  | -0.53334 | -1.9863  |
| BIOCARTA_IGF1MTOR_PATHWAY                                                                                                 | .001426 | .014655 | -0.61103 | -1.99336 |
| REACTOME_RESPIRATORY_ELECTRON_TRANSPORT                                                                                   | .000266 | .007722 | -0.46094 | -1.99359 |
| PID_INSULIN_PATHWAY                                                                                                       | .00025  | .007722 | -0.50336 | -2.00542 |
| BIOCARTA_AT1R_PATHWAY                                                                                                     | .00049  | .008787 | -0.5443  | -2.01057 |
| SA_PTEN_PATHWAY                                                                                                           | .000939 | .011763 | -0.64951 | -2.02088 |
| PID_S1P_S1P3_PATHWAY                                                                                                      | .000485 | .008787 | -0.56317 | -2.03072 |
| REACTOME_NUCLEAR_EVENTS_KINASE_AND_TRANSCRIPTION_FACTOR_ACTIVATION                                                        | .000477 | .008787 | -0.59445 | -2.04031 |
| PID_MET_PATHWAY                                                                                                           | .000274 | .007722 | -0.45321 | -2.04404 |
| BIOCARTA_BCR_PATHWAY                                                                                                      | .000494 | .008787 | -0.54535 | -2.04705 |
| PID_IGF1_PATHWAY                                                                                                          | .000486 | .008787 | -0.56539 | -2.05888 |
| BIOCARTA_NDKDYNAMIN_PATHWAY                                                                                               | .00047  | .008787 | -0.66397 | -2.06587 |
| PID_ER_NONGENOMIC_PATHWAY                                                                                                 | .000252 | .007722 | -0.53167 | -2.0776  |
| PID_PRL_SIGNALING_EVENTS_PATHWAY                                                                                          | .000713 | .01092  | -0.61284 | -2.08061 |
| PID_VEGFR1_PATHWAY                                                                                                        | .000478 | .008787 | -0.59481 | -2.08704 |



|                                                           |         |         |          |          |
|-----------------------------------------------------------|---------|---------|----------|----------|
| PID_RAS_PATHWAY                                           | .000486 | .008787 | -0.57519 | -2.09456 |
| KEGG_B_CELL_RECEPTOR_SIGNALING_PATHWAY                    | .000272 | .007722 | -0.47311 | -2.10723 |
| PID_BCR_5PATHWAY                                          | .000267 | .007722 | -0.48644 | -2.11018 |
| PID_P75_NTR_PATHWAY                                       | .000268 | .007722 | -0.48212 | -2.11066 |
| REACTOME_NGF_SIGNALLING_VIA_TRKA_FROM_THE_PLASMA_MEMBRANE | .000298 | .007722 | -0.43129 | -2.12376 |
| ST_ERK1_ERK2_MAPK_PATHWAY                                 | .000488 | .008787 | -0.58296 | -2.14055 |
| BIOCARTA_EIF4_PATHWAY                                     | .000476 | .008787 | -0.63195 | -2.14548 |
| PID_EPHB_FWD_PATHWAY                                      | .000249 | .007722 | -0.55124 | -2.15119 |
| BIOCARTA_FCER1_PATHWAY                                    | .000248 | .007722 | -0.56271 | -2.1707  |
| BIOCARTA_RAS_PATHWAY                                      | .000238 | .007722 | -0.64387 | -2.18593 |
| BIOCARTA_CDC42RAC_PATHWAY                                 | .000466 | .008787 | -0.72132 | -2.19682 |
| BIOCARTA_PTDINS_PATHWAY                                   | .000238 | .007722 | -0.66605 | -2.26123 |
| KEGG_RENAL_CELL_CARCINOMA                                 | .000267 | .007722 | -0.51547 | -2.27391 |
| PID_RET_PATHWAY                                           | .000249 | .007722 | -0.60001 | -2.32758 |

Adjusted p values were calculated using the Benjamin-Hochberg method. A positive enrichment score identifies gene sets enriched in patients with median or higher CD8<sup>+</sup> T-cell density, a negative enrichment score identifies gene sets enriched in patients with less than median CD8<sup>+</sup> T-cell density.

**Supplementary table 6.** Differentially expressed gene sets between patients with median or higher CD8<sup>+</sup> T-cell density and less than median CD8<sup>+</sup> T-cell density at the tumor center

| Pathway                                                                           | p value | Adjusted p value | Enrichment score | Normalized enrichment score |
|-----------------------------------------------------------------------------------|---------|------------------|------------------|-----------------------------|
| REACTOME_IMMUNOREGULATORY_INTERACTIONS_BETWEEN_A_LYMPHOID_AND_A_NON_LYMPHOID_CELL | .00015  | .001675          | 0.856952         | 3.173176                    |
| PID_IL12_2PATHWAY                                                                 | .000149 | .001675          | 0.841314         | 3.123603                    |
| KEGG_ANTIGEN_PROCESSING_AND_PRESENTATION                                          | .000147 | .001675          | 0.823942         | 3.082774                    |
| REACTOME_INTERFERON_ALPHA_BETA_SIGNALING                                          | .000153 | .001675          | 0.831254         | 2.964752                    |
| KEGG_GRAFT_VERSUS_HOST_DISEASE                                                    | .000159 | .001675          | 0.905795         | 2.961281                    |
| REACTOME_INTERFERON_GAMMA_SIGNALING                                               | .00015  | .001675          | 0.800318         | 2.934554                    |
| KEGG_AUTOIMMUNE_THYROID_DISEASE                                                   | .00016  | .001675          | 0.897599         | 2.893335                    |
| KEGG_ALLOGRAFT_REJECTION                                                          | .00016  | .001675          | 0.901104         | 2.88632                     |
| KEGG_NATURAL_KILLER_CELL_MEDIATED_CYTOTOXICITY                                    | .000137 | .001675          | 0.696815         | 2.867681                    |
| KEGG_HEMATOPOIETIC_CELL_LINEAGE                                                   | .000145 | .001675          | 0.735707         | 2.841351                    |
| KEGG_CYTOKINE_CYTOKINE_RECEPTOR_INTERACTION                                       | .000122 | .001675          | 0.63147          | 2.832642                    |
| REACTOME_INTERFERON_SIGNALING                                                     | .000132 | .001675          | 0.663376         | 2.80889                     |
| KEGG_PRIMARY_IMMUNODEFICIENCY                                                     | .000158 | .001675          | 0.850474         | 2.798013                    |
| KEGG_TYPE_I_DIABETES_MELLITUS                                                     | .000157 | .001675          | 0.832317         | 2.792732                    |
| REACTOME_CYTOKINE_SIGNALING_IN_IMMUNE_SYSTEM                                      | .000121 | .001675          | 0.612212         | 2.766562                    |
| KEGG_LEISHMANIA_INFECTION                                                         | .000147 | .001675          | 0.726645         | 2.752867                    |
| KEGG_INTESTINAL_IMMUNE_NETWORK_FOR_IGA_PRODUCTION                                 | .000156 | .001675          | 0.796224         | 2.71923                     |
| KEGG_CELL_ADHESION_MOLECULES_CAMS                                                 | .000134 | .001675          | 0.64779          | 2.707281                    |
| PID_CD8_TCR_DOWNSTREAM_PATHWAY                                                    | .000151 | .001675          | 0.722738         | 2.612611                    |
| BIOCARTA_NKT_PATHWAY                                                              | .000163 | .001675          | 0.849519         | 2.610758                    |
| KEGG_COMPLEMENT_AND_COAGULATION_CASCADES                                          | .000151 | .001675          | 0.706279         | 2.569821                    |
| KEGG_VIRAL_MYOCARDITIS                                                            | .000148 | .001675          | 0.681356         | 2.561212                    |
| BIOCARTA_NO2IL12_PATHWAY                                                          | .000169 | .001675          | 0.921162         | 2.557357                    |
| PID_IL27_PATHWAY                                                                  | .000163 | .001675          | 0.838487         | 2.55111                     |
| PID_IL23_PATHWAY                                                                  | .000158 | .001675          | 0.768823         | 2.529385                    |

|                                                                       |         |         |          |          |
|-----------------------------------------------------------------------|---------|---------|----------|----------|
| REACTOME_CHEMOKINE_RECEPTORS_BIND_CHEMOKINE_S                         | .000152 | .001675 | 0.709527 | 2.521599 |
| PID_CD8_TCR_PATHWAY                                                   | .000151 | .001675 | 0.691579 | 2.506494 |
| REACTOME_INNATE_IMMUNE_SYSTEM                                         | .000123 | .001675 | 0.5625   | 2.504591 |
| PID_IL12_STAT4_PATHWAY                                                | .00016  | .001675 | 0.772804 | 2.491071 |
| KEGG_TOLL_LIKE_RECEPTOR_SIGNALING_PATHWAY                             | .000141 | .001675 | 0.62386  | 2.473224 |
| PID_TCR_PATHWAY                                                       | .000147 | .001675 | 0.651784 | 2.456745 |
| KEGG_JAK_STAT_SIGNALING_PATHWAY                                       | .000134 | .001675 | 0.5832   | 2.437343 |
| REACTOME_PD1_SIGNALING                                                | .00017  | .001675 | 0.897798 | 2.420485 |
| BIOCARTA_IL10_PATHWAY                                                 | .000169 | .001675 | 0.870374 | 2.416357 |
| REACTOME_GENERATION_OF_SECOND_MESSENGER_MOLECULES                     | .000163 | .001675 | 0.792432 | 2.410985 |
| BIOCARTA_CTLA4_PATHWAY                                                | .000169 | .001675 | 0.864716 | 2.40065  |
| BIOCARTA_IL12_PATHWAY                                                 | .000165 | .001675 | 0.811644 | 2.391073 |
| BIOCARTA_TH1TH2_PATHWAY                                               | .000169 | .001675 | 0.871373 | 2.386851 |
| REACTOME_IL_3_5_AND_GM-CSF_SIGNALING                                  | .000157 | .001675 | 0.703983 | 2.385936 |
| REACTOME_THE_ROLE_OF_NEF_IN_HIV1_REPLICATION_AND_DISEASE_PATHOGENESIS | .000161 | .001675 | 0.762485 | 2.382704 |
| REACTOME_ADAPTIVE_IMMUNE_SYSTEM                                       | .00011  | .001675 | 0.494256 | 2.373253 |
| KEGG_LYSOSOME                                                         | .000135 | .001675 | 0.569393 | 2.359652 |
| KEGG_ASTHMA                                                           | .000166 | .001675 | 0.813597 | 2.359057 |
| REACTOME_TCR_SIGNALING                                                | .000153 | .001675 | 0.660841 | 2.356958 |
| PID_INTEGRIN2_PATHWAY                                                 | .000163 | .001675 | 0.764953 | 2.350868 |
| REACTOME_SIGNALING_BY_ILS                                             | .000138 | .001675 | 0.578285 | 2.348734 |
| ST_T_CELL_SIGNAL_TRANSDUCTION                                         | .000154 | .001675 | 0.669371 | 2.34614  |
| BIOCARTA_DC_PATHWAY                                                   | .000169 | .001675 | 0.855622 | 2.343704 |
| REACTOME_COSTIMULATION_BY_THE_CD28_FAMILY                             | .00015  | .001675 | 0.629857 | 2.332273 |
| BIOCARTA_COMP_PATHWAY                                                 | .000169 | .001675 | 0.85028  | 2.329073 |
| BIOCARTA_NKCELLS_PATHWAY                                              | .000166 | .001675 | 0.802803 | 2.327757 |
| REACTOME_COMPLEMENT_CASCADE                                           | .000164 | .001675 | 0.777248 | 2.315421 |
| KEGG_T_CELL_RECEPTOR_SIGNALING_PATHWAY                                | .000137 | .001675 | 0.567459 | 2.310716 |
| BIOCARTA_IL22BP_PATHWAY                                               | .00017  | .001675 | 0.856906 | 2.310239 |

|                                                                                                         |          |         |          |          |
|---------------------------------------------------------------------------------------------------------|----------|---------|----------|----------|
| KEGG_CHEMOKINE_SIGNALING_PATHWAY                                                                        | 0.000126 | .001675 | 0.525937 | 2.305414 |
| PID_NFAT_TFPATHWAY                                                                                      | .000156  | .001675 | 0.66873  | 2.295864 |
| PID_IL4_2PATHWAY                                                                                        | .00015   | .001675 | 0.615357 | 2.278584 |
| REACTOME_IL_RECEPTOR_SHC_SIGNALING                                                                      | .000163  | .001675 | 0.754892 | 2.270147 |
| REACTOME_RIG_I_MDA5_MEDIATED_INDUCION_OF_IFN_ALPHA_BETA_PATHWAYS                                        | .00015   | .001675 | 0.614599 | 2.267089 |
| REACTOME_ANTIGEN_PRESENTATION_FOLDING_ASSEMBLY_AND_PEPTIDE_LOADING_OF_CLASS_I_MHC                       | .000166  | .001675 | 0.781377 | 2.265633 |
| KEGG_CYTOSOLIC_DNA_SENSING_PATHWAY                                                                      | .000156  | .001675 | 0.653425 | 2.243322 |
| BIOCARTA_IL7_PATHWAY                                                                                    | .000169  | .001675 | 0.806483 | 2.238983 |
| PID_CXCR4_PATHWAY                                                                                       | .000138  | .001675 | 0.547744 | 2.217357 |
| PID_IL2_STAT5_PATHWAY                                                                                   | .000161  | .001675 | 0.701352 | 2.210264 |
| REACTOME_NEF_MEDIATES_DOWN_MODULATION_OF_CELL_SURFACE_RECEPTORS_BY_RECRUITING_THEM_TO_CLATHRIN_ADAPTERS | .000166  | .001675 | 0.760419 | 2.204866 |
| NABA_ECM_REGULATORS                                                                                     | .000125  | .001675 | 0.499433 | 2.203032 |
| REACTOME_INTEGRIN_CELL_SURFACE_INTERACTIONS                                                             | .000144  | .001675 | 0.568437 | 2.201686 |
| REACTOME_NEGATIVE_REGULATORS_OF_RIG_I_MDA5_SIGNALING                                                    | .00016   | .001675 | 0.68516  | 2.194632 |
| SA_MMP_CYTOKINE_CONNECTION                                                                              | .00017   | .001675 | 0.813581 | 2.193434 |
| BIOCARTA_CSK_PATHWAY                                                                                    | .000166  | .001675 | 0.755081 | 2.189388 |
| REACTOME_DOWNSTREAM_TCR_SIGNALING                                                                       | .000159  | .001675 | 0.672913 | 2.186522 |
| PID_PI3KCI_PATHWAY                                                                                      | .000153  | .001675 | 0.612945 | 2.186132 |
| BIOCARTA_LAIR_PATHWAY                                                                                   | .00017   | .001675 | 0.81037  | 2.184777 |
| KEGG_SYSTEMIC_LUPUS_ERYTHEMATOSUS                                                                       | .000134  | .001675 | 0.522735 | 2.176884 |
| REACTOME_ANTIGEN_PROCESSING_CROSS_PRESENTATION                                                          | .000146  | .001675 | 0.566807 | 2.170943 |
| BIOCARTA_IL2RB_PATHWAY                                                                                  | .000157  | .001675 | 0.643649 | 2.169162 |
| PID_INTEGRIN_CS_PATHWAY                                                                                 | .000162  | .001675 | 0.694644 | 2.150206 |
| REACTOME_CLASS_A1_RHODOPSIN_LIKE_RECEPTORS                                                              | .000121  | .001675 | 0.475414 | 2.145455 |
| KEGG_B_CELL_RECEPTOR_SIGNALING_PATHWAY                                                                  | .000145  | .001675 | 0.556249 | 2.144445 |
| BIOCARTA_INFLAM_PATHWAY                                                                                 | .000166  | .001675 | 0.732899 | 2.125069 |
| KEGG_RIG_I_LIKE_RECEPTOR_SIGNALING_PATHWAY                                                              | .000151  | .001675 | 0.579982 | 2.10203  |

|                                                         |         |         |          |          |
|---------------------------------------------------------|---------|---------|----------|----------|
| REACTOME_IL_2_SIGNALING                                 | .000157 | .001675 | 0.625209 | 2.097808 |
| SA_CASPASE_CASCADE                                      | .000168 | .001675 | 0.721868 | 2.063028 |
| REACTOME_TRAF6_MEDIATED_IRF7_ACTIVATION                 | .000169 | .001675 | 0.741853 | 2.059555 |
| SIG_PIP3_SIGNALING_IN_B_LYMPHOCYTES                     | .000157 | .001675 | 0.615142 | 2.054797 |
| REACTOME_CELL_SURFACE_INTERACTIONS_AT_THE_VASCULAR_WALL | .000142 | .001675 | 0.519953 | 2.045993 |
| BIOCARTA_CASPASE_PATHWAY                                | .000163 | .001675 | 0.674864 | 2.029484 |
| SIG_BCR_SIGNALING_PATHWAY                               | .000154 | .001675 | 0.576658 | 2.028847 |
| REACTOME_SIGNALING_BY_RHO_GTPASES                       | .000137 | .001675 | 0.492745 | 2.02532  |
| REACTOME_GPVI_MEDIATED_ACTIVATION_CASCADE               | .00016  | .001675 | 0.62831  | 2.025306 |
| PID_TXA2PATHWAY                                         | .00015  | .001675 | 0.542387 | 1.988789 |
| PID_PTP1B_PATHWAY                                       | .000152 | .001675 | 0.555124 | 1.988189 |
| PID_AMB2_NEUTROPHILS_PATHWAY                            | .000156 | .001675 | 0.578179 | 1.974571 |
| REACTOME_GPCR_LIGAND_BINDING                            | .000116 | .001675 | 0.422479 | 1.96325  |
| REACTOME_PEPTIDE_LIGAND_BINDING_RECEPTORS               | .000131 | .001675 | 0.457857 | 1.952069 |
| BIOCARTA_TOB1_PATHWAY                                   | .000339 | .002553 | 0.7016   | 1.947802 |
| REACTOME_GLYCOSPHINGOLIPID_METABOLISM                   | .000158 | .001675 | 0.589777 | 1.940334 |
| BIOCARTA_STATHMIN_PATHWAY                               | .000168 | .001675 | 0.686821 | 1.937238 |
| KEGG_NOD_LIKE_RECEPTOR_SIGNALING_PATHWAY                | .000298 | .002447 | 0.52     | 1.930638 |
| PID_IL6_7_PATHWAY                                       | .000308 | .002447 | 0.549981 | 1.927678 |
| ST_B_CELL_ANTIGEN_RECEPTOR                              | .000314 | .002454 | 0.568009 | 1.925096 |
| PID_BCR_5PATHWAY                                        | .000147 | .001675 | 0.509788 | 1.921523 |
| KEGG_LEUKOCYTE_TRANSENDOTHELIAL_MIGRATION               | .000274 | .002447 | 0.468669 | 1.920253 |
| PID_IL2_1PATHWAY                                        | .000302 | .002447 | 0.525267 | 1.911203 |
| NABA_ECM_AFFILIATED                                     | .000131 | .001675 | 0.449359 | 1.911192 |
| PID_FCER1_PATHWAY                                       | .000298 | .002447 | 0.514685 | 1.910906 |
| PID_EPO_PATHWAY                                         | .000476 | .00315  | 0.583588 | 1.907901 |
| REACTOME_GPCR_DOWNSTREAM_SIGNALING                      | .000112 | .001675 | 0.400254 | 1.907766 |
| REACTOME_ER_PHAGOSOME_PATHWAY                           | .0003   | .002447 | 0.517875 | 1.905251 |
| REACTOME_NUCLEOTIDE_LIKE_PURINERGIC_RECEPTORS           | .00051  | .003308 | 0.706361 | 1.904365 |
| BIOCARTA_IL2_PATHWAY                                    | .000329 | .00252  | 0.645293 | 1.90101  |

|                                                                                                                           |         |         |          |          |
|---------------------------------------------------------------------------------------------------------------------------|---------|---------|----------|----------|
| REACTOME_RESPIRATORY_ELECTRON_TRANSPORT_ATP_SYNTHESIS_BY_CHEMIOSMOTIC_COUPLING_AND_HEAT_PRODUCTION_BY_UNCOUPLING_PROTEINS | .000329 | .00252  | -0.43015 | -1.90544 |
| KEGG_OOCYTE_MEIOSIS                                                                                                       | .000373 | .002598 | -0.40821 | -1.90848 |
| REACTOME_MITOTIC_G1_G1_S_PHASES                                                                                           | .000403 | .002753 | -0.3981  | -1.91703 |
| REACTOME_TRANSCRIPTION                                                                                                    | .000503 | .003284 | -0.38115 | -1.94656 |
| REACTOME_G1_S_SPECIFIC_TRANSCRIPTION                                                                                      | .002197 | .012106 | -0.63917 | -1.94934 |
| REACTOME_DEPOSITION_OF_NEW_CENPA_CONTAINING_NUCLEOSOMES_AT_THE_CENTROMERE                                                 | .000305 | .002447 | -0.46741 | -1.95185 |
| REACTOME_DNA_REPAIR                                                                                                       | .000369 | .002598 | -0.42144 | -1.95652 |
| REACTOME_G0_AND_EARLY_G1                                                                                                  | .00129  | .007348 | -0.59565 | -1.97164 |
| REACTOME_KINESINS                                                                                                         | .00129  | .007348 | -0.60062 | -1.98811 |
| REACTOME_RNA_POL_II_PRE_TRANSCRIPTION_EVENTS                                                                              | .000295 | .002447 | -0.48719 | -1.98898 |
| REACTOME_CLEAVAGE_OF_GROWING_TRANSCRIPT_IN_THE_TERMINATION_REGION                                                         | .000563 | .003606 | -0.51803 | -1.99411 |
| REACTOME_CHROMOSOME_MAINTENANCE                                                                                           | .000372 | .002598 | -0.42726 | -2.0165  |
| KEGG_SPLICEOSOME                                                                                                          | .000391 | .00271  | -0.42395 | -2.0216  |
| REACTOME_CYCLIN_A_B1_ASSOCIATED_EVENTS_DURIN_G2_M_TRANSITION                                                              | .000729 | .004445 | -0.6987  | -2.04576 |
| REACTOME_MRNA_SPLICING                                                                                                    | .000369 | .002598 | -0.44595 | -2.07031 |
| REACTOME_LATE_PHASE_OF_HIV_LIFE_CYCLE                                                                                     | .000352 | .002598 | -0.45251 | -2.08021 |
| REACTOME_MRNA_PROCESSING                                                                                                  | .000446 | .003009 | -0.42277 | -2.08392 |
| REACTOME_ACTIVATION_OF_THE_PRE_REPLICATIVE_COMPLEX                                                                        | .000265 | .002447 | -0.59353 | -2.08407 |
| REACTOME_RNA_POL_II_TRANSCRIPTION_PRE_INITIATION_AND_PROMOTER_OPENING                                                     | .000276 | .002447 | -0.55816 | -2.11087 |
| REACTOME_PROCESSING_OF_CAPPED_INTRON_CONTAINING_PRE_MRNA                                                                  | .000411 | .00279  | -0.43734 | -2.11805 |
| REACTOME_CHOLESTEROL_BIOSYNTHESIS                                                                                         | .000251 | .002445 | -0.67892 | -2.16463 |
| PID_AURORA_B_PATHWAY                                                                                                      | .000276 | .002447 | -0.57318 | -2.1677  |
| PID_FANCONI_PATHWAY                                                                                                       | .000287 | .002447 | -0.55295 | -2.17978 |
| REACTOME_RECRUITMENT_OF_MITOTIC_CENTROSOME_PROTEINS_AND_COMPLEXES                                                         | .00031  | .002447 | -0.52731 | -2.21354 |
| KEGG_CELL_CYCLE                                                                                                           | .000394 | .002713 | -0.46382 | -2.21439 |

|                                                              |         |         |          |          |
|--------------------------------------------------------------|---------|---------|----------|----------|
| REACTOME_ACTIVATION_OF_ATR_IN_RESPONSE_TO_REPLICATION_STRESS | .000274 | .002447 | -0.61329 | -2.25731 |
| PID_PLK1_PATHWAY                                             | .000281 | .002447 | -0.57841 | -2.26151 |
| REACTOME_E2F_MEDIATED_REGULATION_OF_DNA_REPLICATION          | .000269 | .002447 | -0.63119 | -2.27583 |
| KEGG_BASAL_TRANSCRIPTION_FACTORS                             | .000269 | .002447 | -0.63484 | -2.289   |
| REACTOME_RNA_POL_II_TRANSCRIPTION                            | .000352 | .002598 | -0.4989  | -2.29347 |
| REACTOME_G2_M_CHECKPOINTS                                    | .000279 | .002447 | -0.60646 | -2.3237  |
| REACTOME_LOSS_OF_NLP_FROM_MITOTIC_CENTROSOMES                | .000297 | .002447 | -0.56824 | -2.3255  |
| REACTOME_MITOTIC_M_M_G1_PHASES                               | .000452 | .003029 | -0.48754 | -2.42408 |
| REACTOME_MITOTIC_G2_G2_M_PHASES                              | .000325 | .00252  | -0.55661 | -2.45021 |
| REACTOME_DNA_REPLICATION                                     | .000479 | .00315  | -0.48528 | -2.45461 |
| REACTOME_CELL_CYCLE                                          | .000848 | .005025 | -0.4501  | -2.4821  |
| REACTOME_CELL_CYCLE_MITOTIC                                  | .000672 | .004172 | -0.47804 | -2.56776 |
| REACTOME_MITOTIC_PROMETAPHASE                                | .000332 | .002524 | -0.61104 | -2.71735 |

Adjusted p values were calculated using the Benjamin–Hochberg method. A positive enrichment score identifies gene sets enriched in patients with median or higher CD8<sup>+</sup> T-cell density, a negative enrichment score identifies gene sets enriched in patients with less than median CD8<sup>+</sup> T-cell density.

**Supplementary table 7.** Genomic changes in MHC class I HLA genes from evaluable patients (n=52)

| Patient index | Copy number | LOH p value <sup>a</sup> | HLA-A CPM | Response |
|---------------|-------------|--------------------------|-----------|----------|
| 1             | 0           | .03916                   | 4.868469  | PD       |
| 2             | 3           | .31531                   | 9.497004  | PD       |
| 3             | 2           | .521523                  | 26.80647  | PD       |
| 4             | 2           | .367322                  | 28.56273  | CR       |
| 5             | 3           | 1.48E-14                 | 29.3798   | PR       |
| 6             | 0           | .426004                  | 38.31475  | PR       |
| 7             | 4           | .180245                  | 38.60858  | SD       |
| 8             | 2           | .00332                   | 43.1118   | CR       |
| 9             | 2           | .745383                  | 46.26426  | PR       |
| 10            | 2           | .027803                  | 47.46753  | CR       |
| 11            | 2           | 3.19E-05                 | 48.14221  | PD       |
| 12            | 2           | .628389                  | 55.58881  | PD       |
| 13            | 2           | .258372                  | 56.24426  | PD       |
| 14            | 2           | NA                       | 60.98662  | CR       |
| 15            | 3           | .000117                  | 61.18176  | PR       |
| 16            | 2           | .373787                  | 63.09015  | PD       |
| 17            | 2           | .486616                  | 64.89194  | PD       |
| 18            | 3           | 1.45E-05                 | 67.00792  | CR       |
| 19            | 3           | NA                       | 70.2086   | PR       |
| 20            | 3           | 9.13E-05                 | 73.11615  | PR       |
| 21            | 2           | .074355                  | 90.63647  | PD       |
| 22            | 2           | .898439                  | 90.993    | PR       |
| 23            | 2           | .056999                  | 91.27235  | PD       |
| 24            | 2           | .206808                  | 95.88008  | PD       |
| 25            | 4           | NA                       | 99.93093  | NE       |
| 26            | 2           | .767739                  | 101.437   | NE       |
| 27            | 2           | .215022                  | 105.4922  | PD       |
|               | 13          | .215022                  | 105.4922  | PD       |
|               | 2           | .215022                  | 105.4922  | PD       |



|    |    |          |          |    |
|----|----|----------|----------|----|
| 28 | 6  | .360161  | 106.4498 | CR |
| 29 | 2  | .001388  | 111.1427 | SD |
| 30 | 3  | 1.4E-21  | 128.4024 | PD |
| 31 | 11 | .964307  | 136.0562 | PD |
| 32 | 2  | .05865   | 138.9101 | NE |
| 33 | 4  | .531189  | 141.7456 | SD |
| 34 | 3  | 5.04E-12 | 148.949  | PD |
| 35 | 2  | .779579  | 154.931  | PR |
| 36 | 2  | NA       | 155.1063 | PR |
| 37 | 3  | 3.86E-06 | 158.5355 | PR |
| 38 | 2  | .125364  | 169.9979 | PD |
| 39 | 5  | 4.23E-08 | 195.1644 | PD |
| 40 | 2  | .015731  | 195.6263 | PR |
| 41 | 2  | .148086  | 197.9184 | PR |
| 42 | 2  | .114746  | 212.1019 | SD |
| 43 | 8  | .856964  | 233.8113 | PD |
| 44 | 3  | .000365  | 234.2959 | CR |
| 45 | 3  | .027023  | 239.721  | NE |
| 46 | 5  | .074121  | 262.0522 | CR |
| 47 | 2  | .242573  | 277.4213 | PD |
| 48 | 2  | .0017    | 368.4451 | PD |
| 49 | 2  | .122983  | 620.7722 | CR |
| 50 | 4  | .967667  | 943.726  | PD |
| 51 | 2  | .465484  | NA       | PR |
| 52 | 2  | .001743  | NA       | PR |

Abbreviations: CPM, counts per million; CR, complete response; LOH, loss of heterozygosity; MHC, major histocompatibility complex; NA, not available; NE, not evaluable; PD, progressive disease; PR, partial response; SD, stable disease.

<sup>a</sup>Raw values.

**Supplementary table 8.** Gini index ranking of relevant genes to classify MCPyV+ tumors

| <b>Gene name</b> | <b>Gini index</b> |
|------------------|-------------------|
| ZSCAN1           | 0.122285714       |
| SEMA6C           | 0.121714286       |
| ATF7IP2          | 0.120857143       |
| NOA1             | 0.119714286       |
| FRY              | 0.119142857       |
| AMIGO2           | 0.106857143       |
| TTC12            | 0.104285714       |
| NPHS1            | 0.098571429       |
| GCNT2            | 0.096571429       |
| EIF3M            | 0.095428571       |
| GH2              | 0.094857143       |
| SLC4A8           | 0.094857143       |
| LINC00577        | 0.094285714       |
| RUNDC3A          | 0.090285714       |
| LOC100996342     | 0.09              |
| SVILP1           | 0.09              |
| LONRF2           | 0.087428571       |
| ABCG8            | 0.087428571       |
| ZNF778           | 0.083428571       |
| RFXAP            | 0.081428571       |
| NEUROD2          | 0.08              |
| KCNIP3           | 0.077714286       |
| TRIM17           | 0.077142857       |
| CHST9            | 0.076857143       |
| RPL5             | 0.071428571       |
| LRP1B            | 0.069428571       |
| LOC100996634     | 0.069142857       |
| RTN4RL1          | 0.068285714       |
| CCDC151          | 0.068             |
| ATP8B3           | 0.066             |
| CCDC162P         | 0.066             |
| ZNF835           | 0.065428571       |
| RNF183           | 0.065428571       |
| AQP10            | 0.065142857       |
| C2orf61          | 0.064857143       |
| SHISA9           | 0.064857143       |
| CCNA1            | 0.063714286       |
| SYTL3            | 0.063142857       |
| SLC25A19         | 0.063142857       |
| TAAR6            | 0.062857143       |

|           |             |
|-----------|-------------|
| COL8A1    | 0.059142857 |
| ARHGEF28  | 0.056       |
| CD47      | 0.055428571 |
| RFC3      | 0.055428571 |
| RNF128    | 0.054571429 |
| SLC29A1   | 0.054285714 |
| DLEU1     | 0.053142857 |
| ECHDC3    | 0.052857143 |
| TMEM2     | 0.052285714 |
| MAS1      | 0.052285714 |
| CA9       | 0.052285714 |
| HHIP      | 0.052285714 |
| IL1RAPL1  | 0.052       |
| ADAMTS19  | 0.051714286 |
| TEX14     | 0.051714286 |
| SPIB      | 0.051714286 |
| MIR604    | 0.051142857 |
| PRODH2    | 0.050857143 |
| SRSF8     | 0.05        |
| LINC00173 | 0.048857143 |
| FAM184B   | 0.048857143 |
| RPL39L    | 0.047714286 |
| TAAR8     | 0.046571429 |
| LINC00663 | 0.045142857 |
| SLC7A4    | 0.044857143 |
| RANBP17   | 0.041714286 |
| CD248     | 0.041428571 |
| NT5DC3    | 0.041428571 |
| NUFIP1    | 0.041428571 |
| PRDM5     | 0.041428571 |
| ITGA6     | 0.041428571 |
| EIF4B     | 0.040571429 |
| NBEA      | 0.040285714 |
| NPR2      | 0.040285714 |
| PLCH1     | 0.040285714 |
| TRPM2     | 0.039428571 |
| C1orf95   | 0.039428571 |
| RABEPK    | 0.039428571 |
| RAP1GAP   | 0.039428571 |
| SCN2A     | 0.039428571 |
| MBLAC2    | 0.038857143 |
| EEF1B2    | 0.038857143 |
| RBP1      | 0.038857143 |

|              |             |
|--------------|-------------|
| ZNF667       | 0.038       |
| PLEKHF2      | 0.038       |
| MYRF         | 0.037428571 |
| TEAD2        | 0.037142857 |
| LIN28B       | 0.037142857 |
| SCG5         | 0.036857143 |
| KBTBD6       | 0.036857143 |
| STIL         | 0.033428571 |
| FAM195A      | 0.032857143 |
| TM7SF3       | 0.027714286 |
| APC2         | 0.027714286 |
| CREM         | 0.027714286 |
| FOLR1        | 0.027714286 |
| LOC101929303 | 0.027428571 |
| ABCA2        | 0.026857143 |
| PROK2        | 0.026571429 |
| ABCG5        | 0.025714286 |
| KIRREL2      | 0.025714286 |
| TPRXL        | 0.025428571 |
| EPHA4        | 0.025428571 |
| SCGB2A1      | 0.025428571 |
| ARHGEF10     | 0.025142857 |
| NANP         | 0.024285714 |
| USH1C        | 0.023428571 |
| PALM2        | 0.023428571 |
| CHST15       | 0.022857143 |
| MET          | 0.020571429 |
| PHLDA1       | 0.019714286 |
| LOC101059957 | 0.014       |
| SVIL         | 0.014       |
| EML6         | 0.014       |
| CSDC2        | 0.013714286 |
| PCDH19       | 0.013714286 |
| FBXW12       | 0.013714286 |
| RD3          | 0.013714286 |
| LOC101929726 | 0.012857143 |
| SNX32        | 0.012857143 |
| ABCB9        | 0.012857143 |
| ZAN          | 0.012857143 |
| EDA2R        | 0.012857143 |
| PPP2R3A      | 0.012857143 |
| SALL1        | 0.012857143 |
| LOC101928664 | 0.011428571 |

|                     |             |
|---------------------|-------------|
| <i>SYCP2</i>        | 0.011428571 |
| <i>TG</i>           | 0.011428571 |
| <i>XKR9</i>         | 0.011428571 |
| <i>CACNA1E</i>      | 0.009428571 |
| <i>SLC35D3</i>      | 0.009428571 |
| <i>GPBAR1</i>       | 0.006857143 |
| <i>LOC101929658</i> | 0           |
| <i>MF12-AS1</i>     | 0           |
| <i>ZNF667-AS1</i>   | 0           |
| <i>BMF</i>          | 0           |
| <i>BMPER</i>        | 0           |
| <i>MLK7-AS1</i>     | 0           |
| <i>CDKN2B</i>       | 0           |
| <i>GOT2</i>         | 0           |
| <i>GRIK4</i>        | 0           |
| <i>KALRN</i>        | 0           |

A high Gini index indicates more relevant genes.

Abbreviations: MCPyV, Merkel cell polyomavirus.

**Supplementary table 9.** Treatment-related adverse events (any grade in  $\geq 10\%$  of patients or grade  $\geq 3$  in any patient)

| Treatment-related adverse event (N=116)           | Any grade | Grade $\geq 3$ |
|---------------------------------------------------|-----------|----------------|
| <b>Any treatment-related adverse event, n (%)</b> | 94 (81.0) | 21 (18.1)      |
| Fatigue                                           | 24 (20.7) | 1 (0.9)        |
| Asthenia                                          | 16 (13.8) | 0              |
| Pruritus                                          | 15 (12.9) | 1 (0.9)        |
| IRR <sup>a</sup>                                  | 13 (11.2) | 1 (0.9)        |
| Chills                                            | 12 (10.3) | 0              |
| Lipase increased                                  | 6 (5.2)   | 4 (3.4)        |
| Decreased appetite                                | 6 (5.2)   | 1 (0.9)        |
| ALT increased                                     | 5 (4.3)   | 1 (0.9)        |
| Amylase increased                                 | 3 (2.6)   | 3 (2.6)        |
| AST increased                                     | 2 (1.7)   | 1 (0.9)        |
| Autoimmune nephritis                              | 1 (0.9)   | 1 (0.9)        |
| Autoimmune neuropathy                             | 1 (0.9)   | 1 (0.9)        |
| Cholangitis                                       | 1 (0.9)   | 1 (0.9)        |
| Colitis                                           | 1 (0.9)   | 1 (0.9)        |
| Dehydration                                       | 1 (0.9)   | 1 (0.9)        |
| Dermatitis psoriasiform                           | 1 (0.9)   | 1 (0.9)        |
| Gait disturbance                                  | 1 (0.9)   | 1 (0.9)        |
| Liver function test increased                     | 1 (0.9)   | 1 (0.9)        |
| Paraneoplastic encephalomyelitis                  | 1 (0.9)   | 1 (0.9)        |
| Paraneoplastic syndrome                           | 1 (0.9)   | 1 (0.9)        |
| Polyneuropathy in malignant disease               | 1 (0.9)   | 1 (0.9)        |
| Troponin increased                                | 1 (0.9)   | 1 (0.9)        |
| Tumor lysis syndrome                              | 1 (0.9)   | 1 (0.9)        |
| <b>Any IRR<sup>b</sup></b>                        | 34 (29.3) | 1 (0.9)        |

Abbreviations: ALT, alanine aminotransferase; AST, aspartate aminotransferase; IRR, infusion-related reaction.

<sup>a</sup>Treatment-related IRRs based on the single Medical Dictionary for Regulatory Activities preferred term.

<sup>b</sup>Includes adverse events (irrespective of relatedness) categorized as IRR, drug hypersensitivity, or hypersensitivity reaction that occurred on the day of or the day after infusion, in addition to signs/symptoms of IRR that occurred on day of infusion (during or after the infusion) that resolved on the day of onset or the next day.

**Supplementary table 10.** Immune-related adverse events (any grade in  $\geq 5\%$  of patients or grade  $\geq 3$  in any patient)

| <b>irAE (N=116)</b>                | <b>Any grade</b> | <b>Grade <math>\geq 3</math></b> |
|------------------------------------|------------------|----------------------------------|
| <b>Any irAE, n (%)<sup>a</sup></b> | 35 (30.2)        | 7 (6.0)                          |
| Pruritus                           | 9 (7.8)          | 1 (0.9)                          |
| Rash maculopapular                 | 6 (5.2)          | 0                                |
| ALT increased                      | 3 (2.6)          | 1 (0.9)                          |
| Autoimmune nephritis               | 1 (0.9)          | 1 (0.9)                          |
| Autoimmune neuropathy              | 1 (0.9)          | 1 (0.9)                          |
| Dermatitis psoriasiform            | 1 (0.9)          | 1 (0.9)                          |
| Diabetes mellitus                  | 1 (0.9)          | 1 (0.9)                          |
| Liver function test increased      | 1 (0.9)          | 1 (0.9)                          |

Abbreviations: ALT, alanine aminotransferase; irAE, immune-related adverse event.

<sup>a</sup>Based on a prespecified list of Medical Dictionary for Regulatory Activities preferred terms followed by comprehensive medical review using predefined criteria.



**Supplementary figure 1.** Trial profile.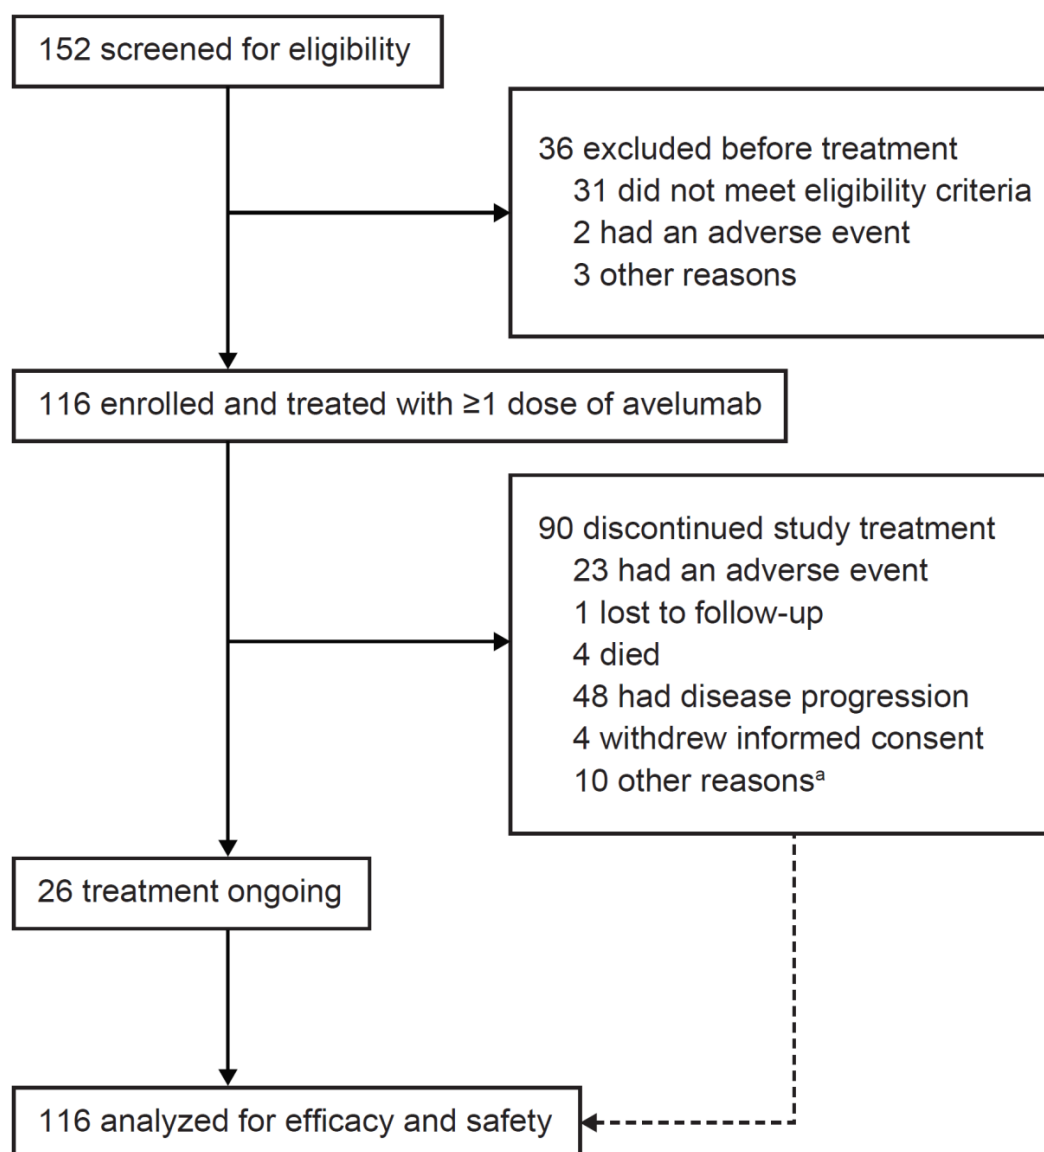

<sup>a</sup>Includes complete response (n=3), patient and investigator's decision (n=3), patient's decision (n=2), sponsor's decision (n=1), and travel logistics and convenience (n=1).

**Supplementary figure 2.** Kaplan-Meier estimate of progression-free survival (N=116).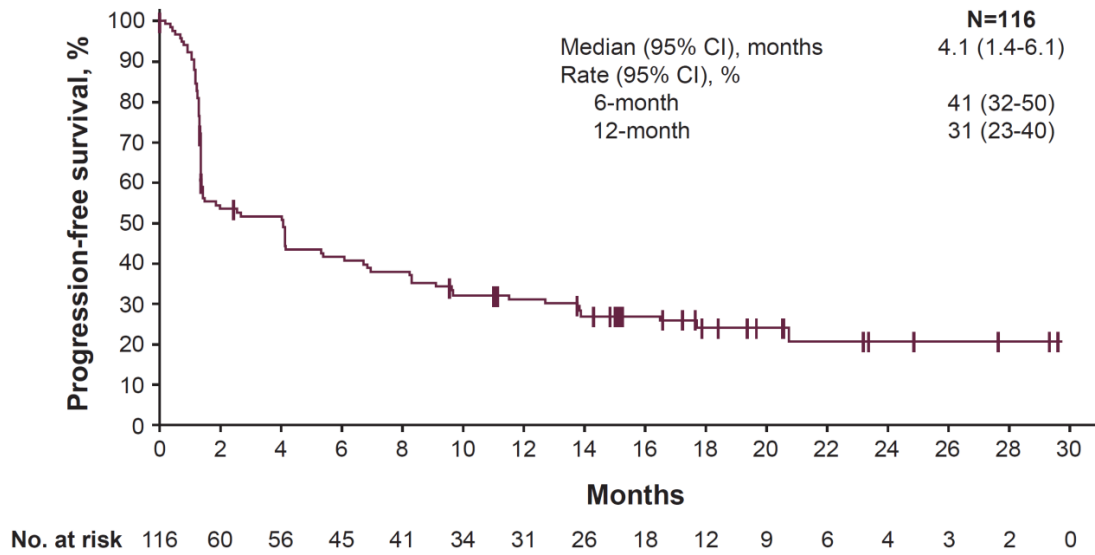

**Supplementary figure 3.** (A) Distribution of TMB in evaluable patients (n=52).Association of TMB with (B) MCPyV status assessed by IHC, (C) PD-L1 status ( $\geq 1\%$ 

cutoff) in evaluable patients (n=50), and (D) response in evaluable patients (n=52).

Boxes represent interquartile range, diamonds denote the mean, lines within the boxes represent the median (upper tertile in A), and circles are observed values. IHC, immunohistochemistry; MCPyV, Merkel cell polyomavirus; NSSV/Mb, nonsynonymous somatic variants per megabase; PD-L1, programmed death ligand 1; TMB, tumor mutational burden.

**A.**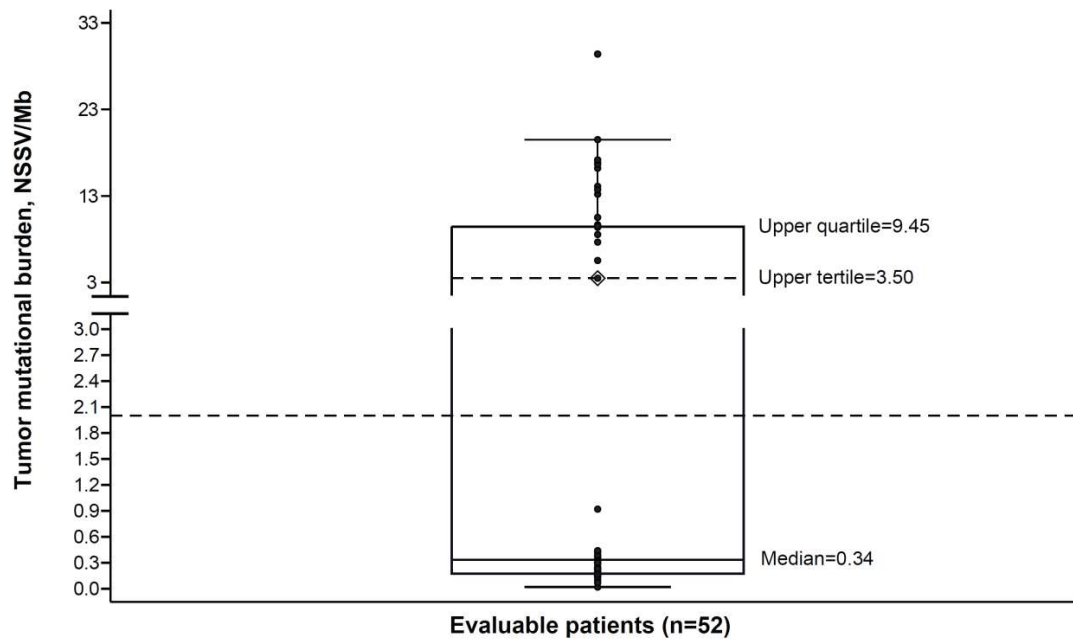

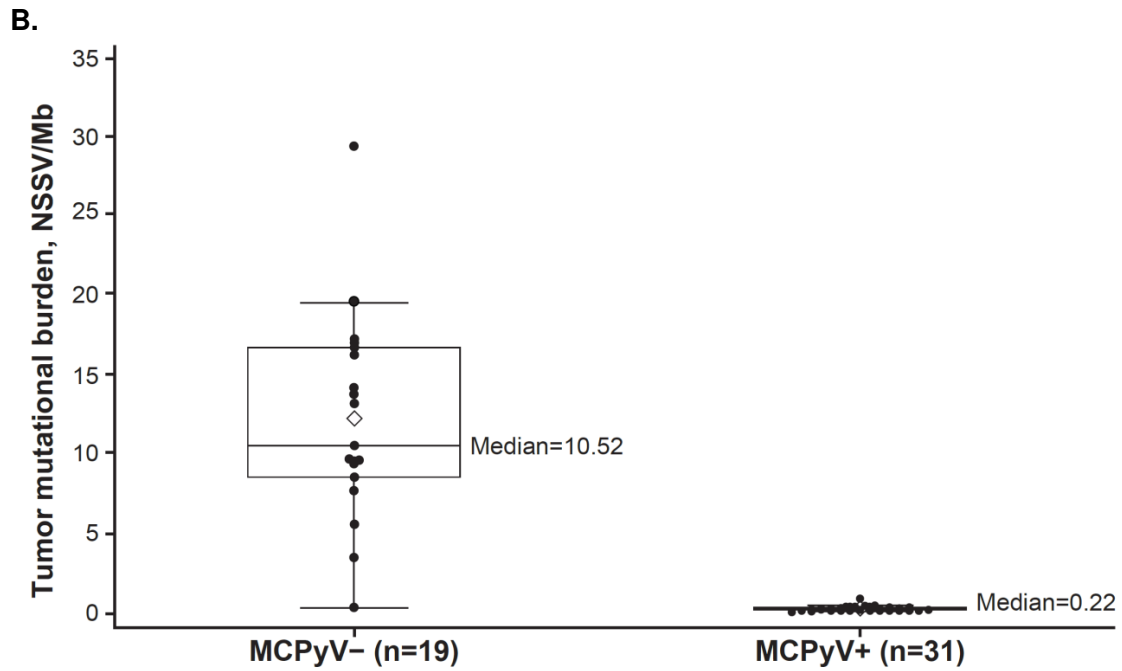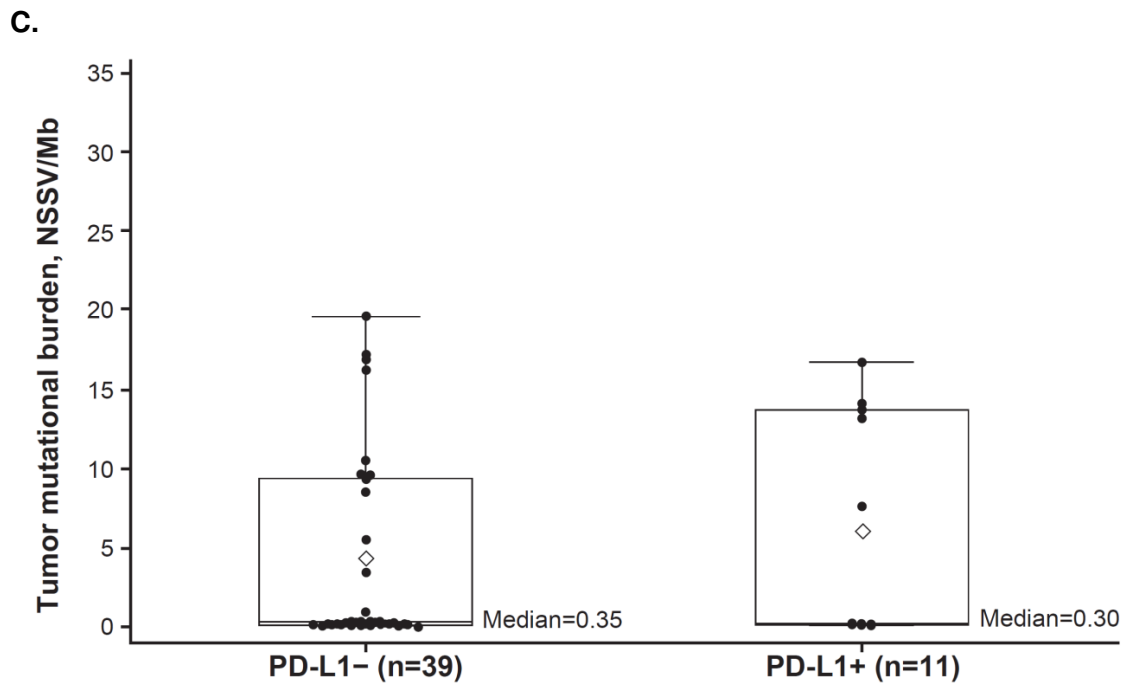

D.

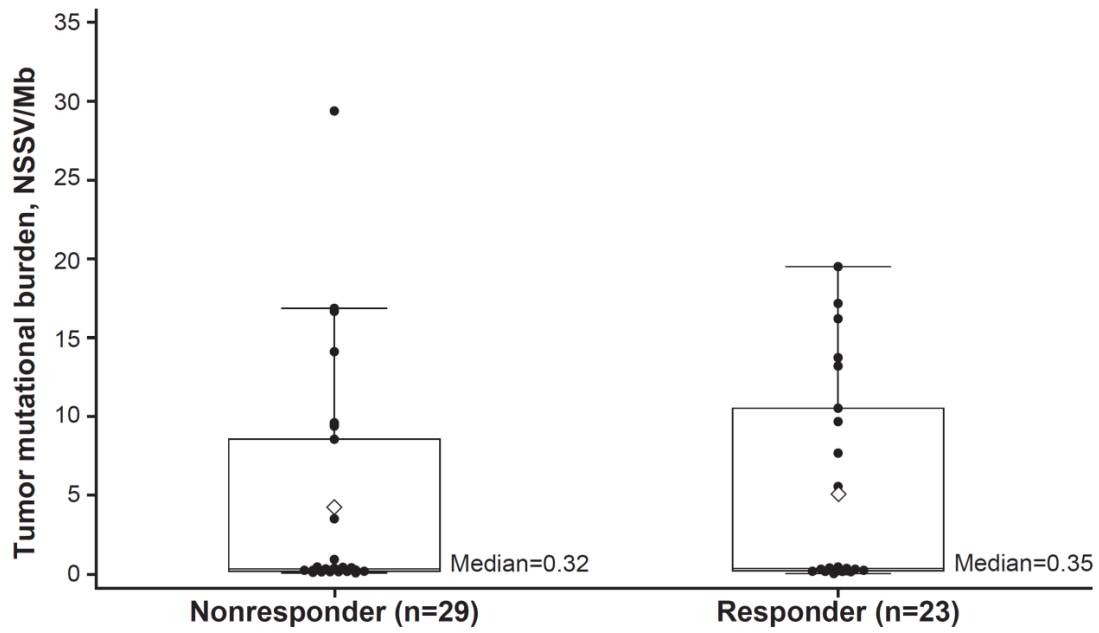

**Supplementary figure 4.** Overall survival in the low TMB (<2 NSSV/Mb) and high TMB ( $\geq 2$  NSSV/Mb) subgroups (n=52). HR, hazard ratio; NSSV/Mb, nonsynonymous somatic variants per megabase; TMB, tumor mutational burden.

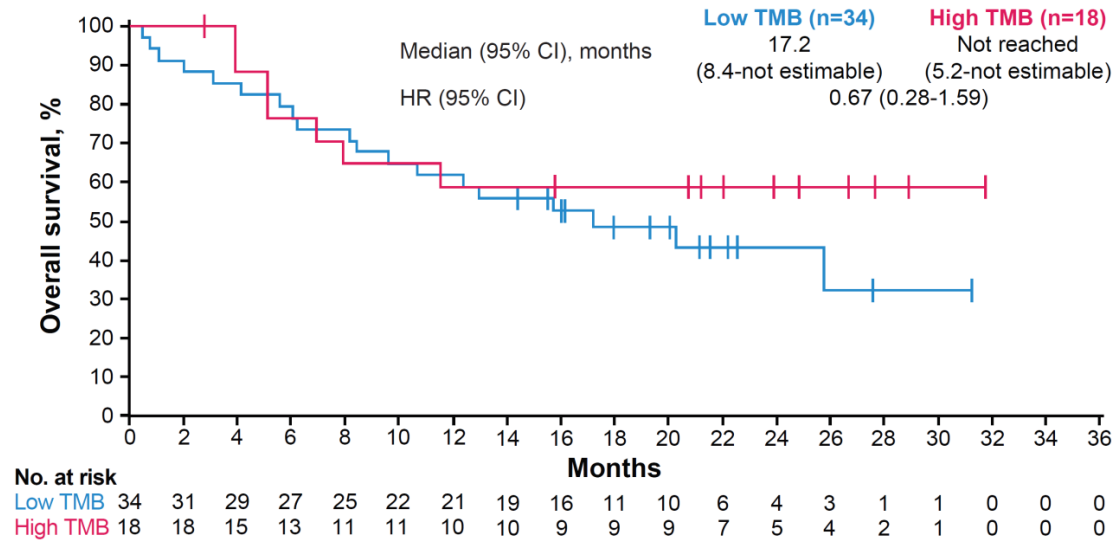

Supplement: inline-supplementary-material-2 [file inline-supplementary-material-2.pdf]
